# Supplementary material for: IUP-BERT: Identification of Umami Peptides Based on BERT Features
Source: MDPI journal article supplement (doi:10.3390/foods11223742), 2022-11-21
Supplement: s1 [file s1]

## **File S1: Datasets for training and independent test**

### **Training dataset for positive sample**

>Positive\_0  
RKE  
>Positive\_1  
VAV  
>Positive\_2  
KGDEESLA  
>Positive\_3  
SAEQK  
>Positive\_4  
CM  
>Positive\_5  
DG  
>Positive\_6  
DE  
>Positive\_7  
EEL  
>Positive\_8  
LVG  
>Positive\_9  
SLAKGDEE  
>Positive\_10  
DD  
>Positive\_11  
VGG  
>Positive\_12  
EEE  
>Positive\_13  
LSERYP  
>Positive\_14  
GCG  
>Positive\_15  
AHSVRFY  
>Positive\_16  
EEEQ  
>Positive\_17  
YGGTPPFV  
>Positive\_18  
EN  
>Positive\_19

LPEEV  
>Positive\_20  
ASNMSDL  
>Positive\_21  
EINEL  
>Positive\_22  
EE  
>Positive\_23  
SE  
>Positive\_24  
GDG  
>Positive\_25  
VDV  
>Positive\_26  
PVARMCRL  
>Positive\_27  
VTADESQQDVLK  
>Positive\_28  
VV  
>Positive\_29  
DPQ  
>Positive\_30  
EQEEL  
>Positive\_31  
HCHTN  
>Positive\_32  
VVGET  
>Positive\_33  
NVVGET  
>Positive\_34  
ENINEL  
>Positive\_35  
SF  
>Positive\_36  
LV  
>Positive\_37  
DEE  
>Positive\_38  
EA  
>Positive\_39  
INEL  
>Positive\_40  
SEE  
>Positive\_41

AQALQAQA  
>Positive\_42  
LQPLNAH  
>Positive\_43  
KGRYER  
>Positive\_44  
GLLPDGTPR  
>Positive\_45  
DES  
>Positive\_46  
PDKPNT  
>Positive\_47  
EGS  
>Positive\_48  
EP  
>Positive\_49  
CCNKSV  
>Positive\_50  
LGAGGSLA  
>Positive\_51  
QVAIAHRDAK  
>Positive\_52  
DQR  
>Positive\_53  
ALPEEV  
>Positive\_54  
GGY  
>Positive\_55  
EQQQQ  
>Positive\_56  
VE  
>Positive\_57  
SPE  
>Positive\_58  
ET  
>Positive\_59  
ENE  
>Positive\_60  
VD  
>Positive\_61  
PET  
>Positive\_62  
KGNEESLA  
>Positive\_63

EDV  
>Positive\_64  
DA  
>Positive\_65  
ANPGPVRDLR  
>Positive\_66  
QL  
>Positive\_67  
RGENESDEQGAIVT  
>Positive\_68  
EG  
>Positive\_69  
AE  
>Positive\_70  
NNP  
>Positive\_71  
VRSY  
>Positive\_72  
LDL  
>Positive\_73  
RPNPFENR  
>Positive\_74  
NGKET  
>Positive\_75  
EK  
>Positive\_76  
SSRNEQSR  
>Positive\_77  
EQE  
>Positive\_78  
RGENESEEEGAIVT  
>Positive\_79  
DDD  
>Positive\_80  
EGSEAPDGSSR  
>Positive\_81  
NRTF  
>Positive\_82  
PE  
>Positive\_83  
NY  
>Positive\_84  
KGSLADEE  
>Positive\_85

VPY  
>Positive\_86  
EL  
>Positive\_87  
EY  
>Positive\_88  
RPLGNC  
>Positive\_89  
VLPTDQNFILR  
>Positive\_90  
DDE  
>Positive\_91  
VEV  
>Positive\_92  
RL  
>Positive\_93  
SLADEEKG  
>Positive\_94  
ADE  
>Positive\_95  
KG  
>Positive\_96  
EDD  
>Positive\_97  
ADA  
>Positive\_98  
EDF  
>Positive\_99  
TE  
>Positive\_100  
QEEL  
>Positive\_101  
ES  
>Positive\_102  
GEG  
>Positive\_103  
PAA  
>Positive\_104  
EDE  
>Positive\_105  
EEDGK  
>Positive\_106  
AD  
>Positive\_107

VDR  
>Positive\_108  
DDDD  
>Positive\_109  
GE  
>Positive\_110  
ED  
>Positive\_111  
TLRRCM

## **Training dataset for negative sample**

>Negative\_0  
EQPQQNE  
>Negative\_1  
QDKIHPPFAQTQSLVYPFPGP  
>Negative\_2  
GRP  
>Negative\_3  
FGG  
>Negative\_4  
LAGNQEEE  
>Negative\_5  
APK  
>Negative\_6  
KPF  
>Negative\_7  
GGLGG  
>Negative\_8  
PGI  
>Negative\_9  
AF  
>Negative\_10  
YY  
>Negative\_11  
IG  
>Negative\_12  
FGGF  
>Negative\_13  
RPGFF  
>Negative\_14  
FGF  
>Negative\_15

QSKVLPVPQ  
>Negative\_16  
GNPDIEHP  
>Negative\_17  
VYPFPPGIGG  
>Negative\_18  
GF  
>Negative\_19  
IV  
>Negative\_20  
RG  
>Negative\_21  
FLL  
>Negative\_22  
GPPF  
>Negative\_23  
FYPELF  
>Negative\_24  
KLHENIAR  
>Negative\_25  
GPG  
>Negative\_26  
LA  
>Negative\_27  
YYY  
>Negative\_28  
LGGGG  
>Negative\_29  
GGP  
>Negative\_30  
YL  
>Negative\_31  
QLFGPNVNPWHNP  
>Negative\_32  
RGPPFFF  
>Negative\_33  
RGPPF  
>Negative\_34  
VIFPPGR  
>Negative\_35  
PK  
>Negative\_36  
YGG  
>Negative\_37

VVVPPFLQP  
>Negative\_38  
VL  
>Negative\_39  
YPFPGPIHNS  
>Negative\_40  
GGRPFF  
>Negative\_41  
YQEPVLGPVRGPFPI  
>Negative\_42  
PFPGPIP  
>Negative\_43  
PPF  
>Negative\_44  
AQTQSLVYPFPGPIPNSLPQNIPPLTQ  
>Negative\_45  
RRPPPPFF  
>Negative\_46  
RGPGPIIV  
>Negative\_47  
RGPPFI  
>Negative\_48  
RPF  
>Negative\_49  
YG  
>Negative\_50  
ALEPDHR  
>Negative\_51  
VPPFLE  
>Negative\_52  
RPGGFF  
>Negative\_53  
PGPGPG  
>Negative\_54  
GGF  
>Negative\_55  
VIPFPGR  
>Negative\_56  
LGL  
>Negative\_57  
RPFG  
>Negative\_58  
LL  
>Negative\_59



FF  
>Negative\_60  
RP  
>Negative\_61  
QLFGPNVNPWHNP  
>Negative\_62  
KPK  
>Negative\_63  
RGPPGFF  
>Negative\_64  
AV  
>Negative\_65  
PVLGPVRGPFPIIV  
>Negative\_66  
VYPFPPGI  
>Negative\_67  
YQEPVLGPVRGPFPIIV  
>Negative\_68  
RGPPGGFF  
>Negative\_69  
RGPEPIIV  
>Negative\_70  
RGPPFIIV  
>Negative\_71  
QPVLGPVRGPFPIIV  
>Negative\_72  
GY  
>Negative\_73  
VIF  
>Negative\_74  
DY  
>Negative\_75  
VYPFPPGINH  
>Negative\_76  
RPKHPIKHQ  
>Negative\_77  
EPAD  
>Negative\_78  
FG  
>Negative\_79  
SL  
>Negative\_80  
MPFPHYVPEPF  
>Negative\_81

QLFNPSTNPWHSP  
>Negative\_82  
GPVRGPFPIIV  
>Negative\_83  
YQQPVLGPVRGPFPI  
>Negative\_84  
RRPPGF  
>Negative\_85  
YQQPVLGPVRGPFPII  
>Negative\_86  
RGFF  
>Negative\_87  
VVVPPFL  
>Negative\_88  
YPFPGPI  
>Negative\_89  
KAVPYPPQ  
>Negative\_90  
VPLGTQYTDAPSF  
>Negative\_91  
QLFNPSTNP  
>Negative\_92  
APFPEVFG  
>Negative\_93  
PL  
>Negative\_94  
LF  
>Negative\_95  
QNDKIHPFAQTQSLVYPFGPIP  
>Negative\_96  
PG  
>Negative\_97  
FPF  
>Negative\_98  
LRL  
>Negative\_99  
FFG  
>Negative\_100  
PI  
>Negative\_101  
QLFNPS  
>Negative\_102  
GP  
>Negative\_103

PGPIP  
>Negative\_104  
LI  
>Negative\_105  
FIV  
>Negative\_106  
GPFPII  
>Negative\_107  
LG  
>Negative\_108  
PF  
>Negative\_109  
GGGLG  
>Negative\_110  
GFF  
>Negative\_111  
GGV  
>Negative\_112  
GV  
>Negative\_113  
YGY  
>Negative\_114  
RGPPGIG  
>Negative\_115  
VYPF  
>Negative\_116  
SAEFG  
>Negative\_117  
YLGYLEQLLR  
>Negative\_118  
RGPPGGGFF  
>Negative\_119  
YF  
>Negative\_120  
YEGNS  
>Negative\_121  
GGRGPPFIV  
>Negative\_122  
IT  
>Negative\_123  
FY  
>Negative\_124  
QQPVLGPVRGPFPI  
>Negative\_125

PFPGPI  
>Negative\_126  
GL  
>Negative\_127  
VYP  
>Negative\_128  
AYFYPEL  
>Negative\_129  
FL  
>Negative\_130  
GPFPVI  
>Negative\_131  
NFNNQLDQQTPR  
>Negative\_132  
RRR  
>Negative\_133  
PFP  
>Negative\_134  
FFPP  
>Negative\_135  
ELL  
>Negative\_136  
LVYPPFGPIHN  
>Negative\_137  
GLGG  
>Negative\_138  
LGG  
>Negative\_139  
RGPFPIIV  
>Negative\_140  
TDVENLHLPPLL  
>Negative\_141  
FPP  
>Negative\_142  
WE  
>Negative\_143  
SLA  
>Negative\_144  
PFIV  
>Negative\_145  
GLY  
>Negative\_146  
LGGG  
>Negative\_147

VI  
>Negative\_148  
PPFIV  
>Negative\_149  
VYPFPPIGNH  
>Negative\_150  
RGP  
>Negative\_151  
GGFFGG  
>Negative\_152  
GR  
>Negative\_153  
GGL  
>Negative\_154  
GPFF  
>Negative\_155  
RGPPGF  
>Negative\_156  
EQGGEQG  
>Negative\_157  
RPFFGG  
>Negative\_158  
IK  
>Negative\_159  
KPPFIV  
>Negative\_160  
IP  
>Negative\_161  
LY  
>Negative\_162  
VY  
>Negative\_163  
RGPPFIV  
>Negative\_164  
IQ  
>Negative\_165  
IW  
>Negative\_166  
RPG  
>Negative\_167  
WF  
>Negative\_168  
RGPFIV  
>Negative\_169

LRP  
>Negative\_170  
PPP  
>Negative\_171  
RRPFF  
>Negative\_172  
EEN  
>Negative\_173  
YPF  
>Negative\_174  
WW  
>Negative\_175  
FV  
>Negative\_176  
PA  
>Negative\_177  
PPG  
>Negative\_178  
GGGGL  
>Negative\_179  
FALPQYLK  
>Negative\_180  
GKHQQEEENEKG  
>Negative\_181  
GVV  
>Negative\_182  
PGR  
>Negative\_183  
FW  
>Negative\_184  
GGGL  
>Negative\_185  
LD  
>Negative\_186  
GGRPFEGG  
>Negative\_187  
GLG  
>Negative\_188  
VIFPPG  
>Negative\_189  
IF  
>Negative\_190  
QLFNPSTNPWH  
>Negative\_191

FFPGG  
>Negative\_192  
GPFPIIV  
>Negative\_193  
VYFPFPPG  
>Negative\_194  
RGPPGGV  
>Negative\_195  
GLL  
>Negative\_196  
RGPPFF  
>Negative\_197  
RPPPPFF  
>Negative\_198  
NALPE  
>Negative\_199  
FPPFIV  
>Negative\_200  
RPFFRPFFRPFF  
>Negative\_201  
GGRGPPFIVGG  
>Negative\_202  
YLEQLLR  
>Negative\_203  
EVLN  
>Negative\_204  
EGG  
>Negative\_205  
LW  
>Negative\_206  
LLL  
>Negative\_207  
GGVVV  
>Negative\_208  
GGFF  
>Negative\_209  
NNEDT  
>Negative\_210  
QLFNPSTNPWHSP  
>Negative\_211  
MAPKHKEMPFPKYPVEPF  
>Negative\_212  
KF  
>Negative\_213

NLQG  
>Negative\_214  
FPK  
>Negative\_215  
RGPFPPIV  
>Negative\_216  
RPFF  
>Negative\_217  
IGTLAGA  
>Negative\_218  
EI  
>Negative\_219  
APFPEVF  
>Negative\_220  
PP  
>Negative\_221  
PVRGPFPIIV  
>Negative\_222  
FFVAPFPEVFGK  
>Negative\_223  
FP  
>Negative\_224  
IL  
>Negative\_225  
PVLGPV  
>Negative\_226  
FFPR  
>Negative\_227  
RRPPFF  
>Negative\_228  
VVYPWTQRF  
>Negative\_229  
GYG  
>Negative\_230  
PY  
>Negative\_231  
RGPPFGG  
>Negative\_232  
YYG  
>Negative\_233  
GFG  
>Negative\_234  
YP  
>Negative\_235



LLLL  
>Negative\_236  
GYY  
>Negative\_237  
RPFFRPFF  
>Negative\_238  
IE  
>Negative\_239  
IS  
>Negative\_240  
VA

## **Independent dataset for positive sample**

>Positive 0  
CALTP  
>Positive 1  
AEA  
>Positive 2  
VG  
>Positive 3  
VF  
>Positive 4  
AAPY  
>Positive 5  
VEL  
>Positive 6  
TESSSE  
>Positive 7  
TAY  
>Positive 8  
STMLESER  
>Positive 9  
SFE  
>Positive 10  
PSE  
>Positive 11  
PAQ  
>Positive 12  
LYER  
>Positive 13  
LEQL  
>Positive 14  
LE

>Positive 15  
HV  
>Positive 16  
GGNP  
>Positive 17  
GD  
>Positive 18  
EV  
>Positive 19  
EPE  
>Positive 20  
EGF  
>Positive 21  
EED  
>Positive 22  
EDG  
>Positive 23  
EAGIQ  
>Positive 24  
DL  
>Positive 25  
DGG  
>Positive 26  
DEL  
>Positive 27  
DED

## **Independent dataset for negative sample**

>Negative 0  
YQQPVLGPVRGPFPIIV  
>Negative 1  
PIP  
>Negative 2  
FI  
>Negative 3  
PGP  
>Negative 4  
FGFG  
>Negative 5  
PGG  
>Negative 6  
PFPP

>Negative 7  
PFPIIV  
>Negative 8  
PFPGPIPNS  
>Negative 9  
FFRPFFRPFF  
>Negative 10  
FFPG  
>Negative 11  
FFPE  
>Negative 12  
FFGG  
>Negative 13  
WWW  
>Negative 14  
FFF  
>Negative 15  
WP  
>Negative 16  
WL  
>Negative 17  
NENLL  
>Negative 18  
NALEPDHRVE  
>Negative 19  
EF  
>Negative 20  
VYPFGGGINH  
>Negative 21  
DV  
>Negative 22  
DLL  
>Negative 23  
LLG  
>Negative 24  
VVV  
>Negative 25  
VPPFLQ  
>Negative 26  
LGYLEQLL  
>Negative 27  
APKHKEMPFPKYPVEPF  
>Negative 28  
AL

>Negative 29  
VIIPFPGR  
>Negative 30  
VIIPFPG  
>Negative 31  
LEQLL  
>Negative 32  
AGNPDIEHPE  
>Negative 33  
KP  
>Negative 34  
RRPP  
>Negative 35  
RR  
>Negative 36  
RPPFIV  
>Negative 37  
IN  
>Negative 38  
II  
>Negative 39  
RPGF  
>Negative 40  
ID  
>Negative 41  
IA  
>Negative 42  
GW  
>Negative 43  
RGPPGGF  
>Negative 44  
RGPPGFG  
>Negative 45  
GPPFIV  
>Negative 46  
RGPPFIVRGPPFIV  
>Negative 47  
RGPPFIVGG  
>Negative 48  
GMIYPG  
>Negative 49  
RGPKPIIV  
>Negative 50  
GLGGG

>Negative 51  
GI  
>Negative 52  
RGGFIV  
>Negative 53  
RF  
>Negative 54  
RDMPIQAFLLY  
>Negative 55  
QNDKIHPFAQTQSLVYPFGPIPNSLPQNIPPLTQTPVVV  
>Negative 56  
GGLG  
>Negative 57  
QLFNPSTNPWH  
>Negative 58  
FYPELFR  
>Negative 59  
FYPE  
>Negative 60  
PR
